1        **Title**

2        **Characterization of genomic DNA of lactic acid bacteria for activation of**  
3 **plasmacytoid dendritic cells .**

4

5        **Authors**

6        Akira Horie<sup>1),2)</sup>, Yasuyuki Tomita<sup>1)</sup>, Konomi Oshio<sup>1)</sup>, Daisuke Fujiwara<sup>1)</sup> , and  
7 Toshio Fujii\*<sup>1)</sup>

8

9        **Affiliations**

10        1) Central Laboratories for Key Technologies, Kirin Co., Ltd., Yokohama, Japan,

11        2) Research Laboratories for Beverage Technologies, Kirin Co., Ltd., Yokohama,  
12 Japan

13

14        **Contact Information**

15        \* Corresponding author

16        Toshio Fujii

17        Address; Central Laboratories for Key Technologies, Kirin Co., Ltd.,

18        Yokohama, Japan 1-13-5, Fukuura Kanazawa Yokohama Kanagawa, 2360004

19 Japan,

20        Mail; tfujii@kirin.co.jp

21        Phone; +81 45 788 7200,    Fax +81 45 788 4042

22

23        **Running title**

24        CpG motif in the low-GC region of bacterial genome DNA

25        **Key Words**

26        Plasmacytoid dendritic cells, type I interferon,

27        *Lactococcus lactis* subsp. *lactis* LC-Plasma, CpG, TLR9, G+C contents

28

29        **Abstract**

30        *Lactococcus lactis* strain Plasma (LC-Plasma) possesses strong activity of  
31        stimulating plasmacytoid dendritic cells (pDCs) via the TLR9-Myd88 pathway. To  
32        reveal the effective genome structure for pDCs stimulatory activity, we performed an  
33        *in vitro* screening, using randomly selected DNA fragments from the LC-Plasma  
34        genome. The results showed that CpG motifs are necessary factor for active DNA  
35        fragment, but the copy number of CpG motifs did not show strong correlation to the  
36        pDCs stimulatory activity of DNA fragment. We also found that the G+C contents of  
37        DNA fragments have significant negative effects on pDCs stimulatory activity. We also  
38        performed bioinformatics analysis of genome of lactic acid bacteria (LAB) and  
39        investigated the relation between CpG copy number in the genome and pDCs  
40        stimulatory activity. We found that strains of lactic acid bacteria (LAB) with high copy  
41        number of CpG motifs in the low-G+C region of the genome had higher probability of  
42        having high pDCs stimulatory activity. Three species, *L. lactis* subsp. *lactis*,  
43        *Leuconostoc mesenteroides*, and *Pediococcus pentosaceus* were the typical examples  
44        of high pDCs stimulatory activity LAB.

45        **Importance**

46        This study provides a new perspective on the structure of DNA fragments that are  
47        able to activate pDCs via the TLR9-Myd88 pathway. The information from this study  
48        should be useful for designing new DNA fragments, including  
49        phosphodiesterbond-DNA oligomers containing CpG motifs and DNA-containing  
50        vaccines. This work also presented an *in silico* screening method for identifying

51 bacterial species that are able to activate pDCs. Therefore, this study should be useful  
52 for providing data for the development of vaccine adjuvants and therapeutics for  
53 infectious and allergic diseases.

54           **Introduction**

55           Immunomodulatory effects of lactic acid bacteria (LAB) have attracted growing  
56 attention over decades. Numerous animal studies and clinical studies have  
57 demonstrated that LAB have antiallergic activity (1) and antiviral activity (2, 3). The  
58 cell products of probiotics that are responsible for immunomodulation are largely not  
59 known but might involve modifications of some of the known Microbe Associated  
60 Molecular Patterns (MAMPs) such lipoteichoic acids (LTA), exopolysaccharides,  
61 RNA, and DNA. Interestingly, several studies suggested that strength of  
62 immunomodulatory activities depends on the species and strains on LAB (4-6).

63           Plasmacytoid dendritic cells (pDCs), a subset of dendritic cells (DCs) are immune  
64 cells that have a crucial function in the body's defense against viral infections (7, 8).  
65 The pDCs originate in the bone marrow from myeloid and lymphoid precursors and  
66 require fms-like kinase 3 (Flt3L) for development. The pDCs sense DNA and RNA  
67 viruses through toll-like receptor 9 (TLR9) and TLR7, respectively, and subsequently  
68 produce interferon-alpha (IFN- $\alpha$ ) (9), which induces the expression of genes coding  
69 for antiviral proteins such as MxA, viperin, and 2'-5'-oligoadenylate synthase. Several  
70 recent studies have revealed that pathogenic bacteria such as *Staphylococcus aureus*  
71 (10-12), *Neisseria meningitidis*, *Haemophilus influenza* (12), and *Streptococcus*  
72 *pyrogenes* (13) are able to enhance IFN- $\alpha$  production in mice and humans. However,  
73 well-known probiotic LAB strains such as *Lactobacillus* and *Bifidobacterium* have not  
74 yet been reported to activate pDCs.

75           We previously found that a specific strain of LAB, LC-Plasma (synonym of

76 *Lactococcus lactis* subsp. *lactis* JCM 5805) was able to stimulate murine pDCs to  
77 produce IFN- $\alpha$  (5). Oral administration of LC-Plasma was found to result in  
78 significant immunomodulatory activity and enhanced antiviral activity in mice and  
79 humans (14-17). We also found that the LC-plasma stimulate pDCs via TLR9-Myd 88  
80 pathway (5). This suggested that CpG motifs of genome DNA was the main MAMPs  
81 for pDCs stimulation.

82 It is well known unmethylated CpG motifs of bacterial genome that is the ligand  
83 of TLR9 (18, 19). Firstly, 5'-GACGTC-3', 5'-AGCGCT-3', and 5'-AACGTT-3' was  
84 identified as *efficient* immunostimulatory oligonucleotide ISS-ODN (20) and  
85 following studies proved that CpG containing hexamers, known as CpG motifs are  
86 able to stimulate B cells (18), and pDCs (21, 22). Various types of CpG-motifs have  
87 demonstrated as potent immunostimulatory DNA sequences (23). Studies of ODNs  
88 with phosphorothioate backbones for clinical application revealed the key structure of  
89 ISS-ODNs. For example, Hartmann et al. studied the effect of base change inside and  
90 outside of hexamers on activation of B cells and NK cells (24). Lenert et al. studied  
91 the extended sequence preferences both on ISS-ODN and immuno-inhibitory ODN  
92 (INH-ODN) on B cells (25). It was proposed that 5'-RRCGY-3' and 5'-GTCGTT-3'  
93 are optimal consensus sequences for B cell activation in mice and primate,  
94 respectively (18, 24). The ISS-ODN containing CpG motif for pDCs activation was  
95 lately identified (22). The structural preference for ODN to activate pDCs was  
96 distinctly different from the ODN for B cells. 5'-RRCGRYCGYY-3',  
97 5'-RYCGYRTCGYR-3', and 5'-RYCGRY-3' were the most efficiently activate pDCs.

98 Later, the phosphorothioate bonded oligonucleotides containing the B cell stimulating  
99 motifs designated as Class B ODN and the phosphorothioate bonded oligonucleotides  
100 containing the pDCs stimulating motifs designated as Class A ODN. The importance  
101 of poly-G sequences at the 5' end, the 3' end have also been demonstrated. Fewer  
102 studies are carried out on phosphodiester bond backbone (21, 26, 27) and particular  
103 ODNs with high activity was also proposed.

104 In addition, several reports suggested that more specific CpG motifs or even  
105 non-CpG sequences of LAB are critical for proliferation of B cell activity, including  
106 BL07 motifs in *Bifidobacterium longum* BB536 (28), OL-LB7 motifs in *Lactobacillus*  
107 *delbrueckii* (29), ID35 motifs in *Lactobacillus rhamnosus* GG (30), and OL-LG10  
108 motif from *Lactobacillus gasseri* JCM 1131 (31).

109 In this study, we constructed a library of genomic DNA fragments of LC-Plasma  
110 and investigated the pDCs stimulatory activity of each fragments to identify the  
111 essential character for pDCs activation. As we expected, the CpG motif was necessary  
112 for active DNA fragments. However, we found that the total copy number of CpG  
113 motifs in each DNA fragment was not strongly correlated with its pDCs stimulatory  
114 activity and that the G+C content of a genome DNA fragment has a significant effect  
115 on its potential for pDCs activation. We also performed an *in silico* analysis of the  
116 copy number of CpG motifs in the genome LAB and found that the low-G+C region  
117 of the genome has significant impact on the pDCs stimulation.

118

119 **Results**

120 **CpG motifs are necessary for pDCs stimulatory activity of DNA fragments**  
121 **from LC-Plasma.**

122 In order to confirm that the necessity of CpG motifs for pDCs stimulatory activity,  
123 we performed *in vitro* experiment using PCR fragments. Four CpG-rich genomic loci  
124 (R1 R2, R3, and R4), and 2 CpG-free genomic loci (F1 and F2) were selected from the  
125 LC-Plasma genome. Three or four different fragments of each loci were selected and  
126 PCR primers were designed. The length and the copy number of CpG motifs in each  
127 fragments are shown in Table S1. In total, twelve CpG-rich DNA fragments and 7  
128 non-CpG fragments were amplified and subjected to pDCs stimulating assay. The  
129 IFN- $\alpha$  production of pDCs stimulated with these amplified fragments was shown in  
130 Fig. 1. Eleven of 12 CpG-rich DNA fragments strongly induced IFN- $\alpha$  production,  
131 while none of the CpG-free fragments induced IFN- $\alpha$  production. These results  
132 strongly suggested CpG motif is necessary for pDCs stimulation.

133 **The copy number of CpG motifs are not strongly correlated to the pDCs**  
134 **stimulatory activity of DNA fragments from LC-Plasma.**

135 To reveal the copy numbers of CpG motif are related to the level of pDCs  
136 stimulatory activity, we constructed another library of DNA fragments from  
137 LC-Plasma. Fragments of approximately 200 bp with varied numbers of CpG motifs  
138 were randomly selected from the LC-Plasma genome (Table S2). The PCR-amplified  
139 fragments were subjected to assays for pDCs stimulatory activity.

140 We analyzed the correlation between pDCs stimulatory activity and copy number



141 of CpG motifs in each DNA fragment (Fig. 2A). The results showed that the copy  
142 number of CpG motifs in the fragments was positively significantly correlated with  
143 activity ( $p < 0.01$ ), and the correlation coefficient was  $R = 0.491$ , “moderate  
144 coefficient” defined by Guilford et.al. However, determination coefficient ( $R^2$ ) was  
145 only 0.24 which means another factor affects the pDCs stimulatory activity.

146 **G+C content of DNA fragments from LC-Plasma is negatively correlated**  
147 **with pDCs stimulatory activity.**

148 We then studied the relation of the G+C contents of DNA fragments with the  
149 level of pDCs stimulatory activity. A significant negative correlation between pDCs  
150 stimulatory activity and G+C contents of the fragment ( $R = -0.474$ ,  $p < 0.01$ , Fig. 2B)  
151 was observed. We performed bilayer stratified analysis based on G+C contents and  
152 compared the relation between the copy number CpG motifs and pDCs stimulatory  
153 activity. The DNA fragments into the low-G+C group composed of fragments with  
154  $G+C < 40\%$ , and the high-G+C group composed of fragments with  $G+C \geq 40\%$ . (Fig.  
155 3A and 3B). The correlation coefficient was increased in both of the low-G+C group  
156 ( $R = 0.680$ ,  $p < 0.01$ ) and the high-G+C group ( $R = 0.647$ ,  $p < 0.01$ ). The degree of  
157 pDCs stimulatory activity per copy of CpG motifs was higher in the low-G+C group.

158 We also stratified DNA fragments into groups based on G+C contents as follows:  
159  $< 30\%$ ,  $\geq 30\%$  to  $< 35\%$ ,  $\geq 35\%$  to  $< 40\%$ ,  $\geq 40\%$  to  $< 45\%$ ,  $\geq 45\%$  to  $< 50\%$  and  $\geq 50\%$ .  
160 Stepwise reduction in pDCs stimulatory activity was observed, with a stepwise  
161 increase in G+C contents (Fig. 3C). We performed one-way ANOVA and Dunnet test.  
162 The results revealed that the levels of pDCs activity resulting from stimulation by

163 fragments with G+C contents of  $\geq 40\%$  to  $< 45\%$ ,  $\geq 45\%$  to  $< 50\%$ , and  $\geq 50\%$  were  
164 significantly lower compared to the activity induced by fragments with  $< 30\%$  G+C.  
165 We also performed correlation analyses using randomly synthesized 300 bp fragments.  
166 Similar results were observed again (Fig. S1). These results strongly suggested that  
167 G+C content of DNA fragment is another essential factor to affect high level of pDCs  
168 stimulatory activity.

169 **Total copy number of CpG motifs in the genome DNA are not strongly**  
170 **correlated to the pDCs stimulatory activity of LC-Plasma.**

171 We carried out *in silico* analysis to investigate the relation between the copy  
172 number of CpG motifs and pDCs stimulatory activity. The total copy number of CpG  
173 motifs in the genome of *L. lactis* LC- Plasma was measured and compared to those of  
174 in the genomes of *Lactobacillus rhamnosus* ATCC 53103, and *Bifidobacterium*  
175 *longum* NCC 2705 which showed low pDCs stimulatory activity in a previous study  
176 (5). The results suggested that the number of CpG motifs in the LC- Plasma is three  
177 times smaller than that in the ATCC 53103 and four times smaller than that in  
178 NCC2705 (Table 1). We also measured the three of the pDCs-activating motifs, and  
179 two of B cell activating motifs in the genome of these LABs (Table 1). The results  
180 showed that the genome of ATCC 53103 contained 3.7 to 5.7 fold greater copy number  
181 of pDCs activating motifs and 1.7 to 5.7 fold greater copy number of B cells activating  
182 motifs than that of the genome of LC-Plasma. The genome of NCC2705 contained 5.6  
183 to 17.4 fold greater copy number of pDCs activating motifs and 1.5 to 2.8 fold greater  
184 copy number of B cells activating motifs than that of the genome of LC-Plasma. These

185 results suggested the copy number of CpG motifs are not strongly related to the level  
186 of pDCs stimulatory activity of LC-Plasma.

### 187 **Comparing the pDCs stimulatory activity of single-stranded DNA.**

188 Because G+C content is directly related to the dissociation temperature of  
189 ds-DNA fragments, we evaluated pDCs stimulatory activity induced by synthetic  
190 oligonucleotides in single-stranded (ss) or double-stranded (ds) form. Two ss-CpG  
191 oligomers were synthesized, based on the sequences of ODN 1585 and ODN 2216  
192 (InvivoGen, San Diego, CA, USA). As shown in Fig. 4, both oligonucleotides induced  
193 pDCs stimulatory activity, while their complementary sequences did not. We also  
194 synthesized the ds-form of ODN 1585 and ODN 2216, by annealing the normal and  
195 complementary strands. Interestingly, neither ODN 1585 nor ODN 2216 induced  
196 pDCs stimulatory activity in ds forms. In addition, the sense ODN hybridized with the  
197 antisense 6-bp sequence of the core CpG motif induced high pDCs stimulatory activity.  
198 These results suggest that an ss-CpG oligomer is more efficient at stimulating pDCs  
199 than a ds-CpG oligomer. The results also suggest that strong hybridization affinity  
200 between complementary strands might reduce the pDCs stimulatory activity of CpG  
201 motifs.

### 202 ***In silico* analysis of the copy number of CpG motifs in whole genome and** 203 **low-G+C region of the genome of LAB.**

204 We investigated the frequency of CpG motifs in whole genomes and in the  
205 low-G+C region (<40% of G+C contents) of the genome (Fig. 5A). A linear increase  
206 of frequency of CpG motifs was observed with increasing G+C content of whole

207 genomes. On the contrary, the frequency of CpG motifs localized to low-G+C regions  
208 of the genome showed an inverse correlation with the G+C content of whole genomes  
209 (Fig. 5B). Three species (*Lactococcus lactis* subsp. *lactis*, *Pediococcus pentosaceus*,  
210 and *Leuconostoc mesenteroides*) with the genomes of low G+C contents (35.2% to  
211 37.7%) contains 20 copies/kb CpG motifs in their low-G+C regions, while the other  
212 four species (*L. plantarum*, *L. casei*, *L. fermentum*, and *Bifidobacterium longum*) with  
213 the genomes of high G+C contents (46.6% to 60.1%) contains less than 10 copies/kb  
214 CpG motifs in their low-G+C regions.

215 **The copy number of CpG motifs in the low-G+C region of the genome was**  
216 **closely related to the pDCs stimulatory activity of LAB.**

217 We investigated the differences of pDCs stimulatory activity between strains of  
218 these LAB species (Table 2). The wide variations of strains-based-activity were  
219 observed in each species. It was also observed that the frequencies of  
220 high-activity-strains were clearly different between the species. Five of 7 strains  
221 belonging to *L. lactis* subsp. *lactis* strains, two of 10 *L. mesenteroides* strains, and five  
222 of 19 *P. pentosaceus* strains induced marked (> 100 pg/mL) production of IFN- $\alpha$ . On  
223 the contrary, none of the LAB strains showing a lower frequency of CpG motifs in  
224 low-G+C regions, including *L. plantarum*, *L. casei*, and *L. fermentum*, exhibited  
225 significant stimulatory activity. The means of activity was also higher in the three  
226 strains compared to others. These results strongly suggest that the pDCs stimulatory  
227 activity of a bacterial strain depends on the copy number of CpG motifs in the  
228 low-G+C region of the genome and not on the copy number over the entire genome.

229           We also carried out a statistical analysis of species-based pDCs stimulatory  
230 activity using Steel-Dwass method (Table S4). Significant differences were observed  
231 between *L. lactis* to *P. damnosus*, *L. mesenteroides*, and *Lactobacillus* low G+C species.  
232 Marginally significant difference was also observed between *L. lactis* and  
233 *Lactobacillus* high G+C species. In addition, *P. pentosaceus* and *L. mesenteroides* also  
234 showed significant difference to *Lactobacillus* high G+C species.  
235

236        **Discussion.**

237        Though stain differences of immunostimulatory activity of LAB has been the  
238 focus of interest for these decades, the molecular mechanisms has not yet been well  
239 understood. In the beginning of this study, we hypothesized that CpG copy number in  
240 the genome might be proportional to the pDCs stimulatory activity and that  
241 LC-Plasma may contain greater copy number of CpG motifs and/or some special  
242 sequences containing of CpG motifs. However, our results using DNA fragments and  
243 *in silico* analysis did not supported this hypothesis. In DNA fragment analysis, the  
244 CpG motifs seemed to be necessary for pDCs stimulation, but the correlation of the  
245 copy number of the CpG motifs and pDCs stimulatory activity was weak. In genome  
246 analysis, we could not find greater copy number of total CpG motifs, nor three of  
247 consensus sequences that have been reported as pDCs in the genome of LC-Plasma. In  
248 the long process of DNA fragment analysis, we found that the G+C contents have  
249 negative correlation of pDCs stimulatory activity. The stratification of DNA fragments  
250 based on G+C contents made the correlation between the copy number of CpG motifs  
251 and the pDCs stimulatory activity much stronger. In the genome analysis, we found  
252 that the CpG motifs in the low-G+C region of the genome is critical determinants of  
253 the pDCs stimulatory activity. Taken these together, we demonstrate that the G+C  
254 contents of DNA is one of the critical factor for pDCs stimulatory activity in either of  
255 DNA fragments or genome.

256        The effect of G+C contents on immunostimulatory activity has not yet been fully  
257 studied in the history of CpG motifs. Yamamoto et al. isolated DNA from bacteria,

258 virus, invertebrate, vertebrate, and plant. They investigated the NK stimulatory activity  
259 of DNA samples but no correlation was observed between G+C contents and activity.  
260 To the best of our knowledge, this is the first study that has demonstrated that the G+C  
261 contents of DNA fragments has a direct effect on the immunomodulatory activity of  
262 pDCs.

263 Our results suggested that CpG fragment lost its pDCs stimulating activity by  
264 annealing to the complementary whole strand, while annealing of core sequence of  
265 CpG motif did not reduce the pDCs stimulating activity. This suggested that the  
266 dissociation is important for the CpG-motif containing DNA to stimulate pDCs. The  
267 CpG-motif containing DNA lost its activity by annealing the complementary strand. A  
268 recent study of crystal structures of 3 forms of TLR9 suggested that single-stranded  
269 oligonucleotides bound to TLR9 act as DNA agonists. It is possible that the G+C  
270 contents of DNA and affects the dissociation of ds-DNA fragments and the interaction  
271 with TLR9, which is followed by activation of pDCs. However, some investigators  
272 insist that oligonucleotides cannot occur in ss-forms (32), or that duplex structures are  
273 required for recognition by TLR9 (33, 34). It was suggested that the DNA sequence  
274 around the CpG motifs are also important for activation, since the fragment did not  
275 lost its activity by annealing the complementary strand of core CpG motif. Additional  
276 studies are needed to clarify whether single-strandedness is a key factor for pDCs  
277 activation.

278 Our results also presented a useful *in silico* screening methods of bacteria with  
279 high pDCs stimulatory activity at species level. We showed *L. lactis* subsp. *lactis*,

280 *Pediococcus pentosaceus*, and *Leuconostoc mesenteroides* as typical example of  
281 higher pDCs stimulatory activity. In addition, our data also suggested that the copy  
282 number of CpG motifs in low-G+C region is not the absolute determinant of pDCs  
283 stimulatory activity of bacterial cells. We observed wide variety of pDCs stimulatory  
284 activities of strains in sole species. Moreover, the activity of *Lactococcus lactis* was  
285 significantly higher than those of *Pediococcus pentosaceus*, and *Leuconostoc*  
286 *mesenteroides*, though the copy number of CpG motifs in low-G+C region of those  
287 two species were higher than that of *Lactococcus lactis*. Not only the structure of DNA  
288 but also the bacterial cell's affinity to pDCs or suitability of phagocytosis of pDCs  
289 affects the pDCs stimulating activity.

290 It should be noted that several previous studies were not consistent with our  
291 findings. Bioinformatics study by Kant *et. al.* suggested that the number of CpG  
292 motifs were highly negatively correlated with G+C content, which was also observed  
293 in this study. They also demonstrated that 5'-GTCGTT-3' motif that is one of the most  
294 effective CpG motifs for humans had lower correlation with the G+C contents, and  
295 that the genomes of some probiotic strains had higher frequencies of 5'-GTCGTT-3'  
296 motifs than intestinal bacterial strains (35). The observation in our study did not  
297 support their hypothesis since the frequency of 5'-GTCGTT-3' motifs nor  
298 5'-RRCGY-3' motifs did not correlate with the pDCs stimulating activity. Ménard *et*  
299 *al.* showed that CpG-rich DNA fragments with high G+C content from  
300 *Bifidobacterium longum* were effective for macrophage activation (36). We could not  
301 duplicate the findings of Ménard *et al* when we tested CpG-rich DNA fragments with



302 high G+C content from *B. longum* on BM-derived DCs (data not shown). However,  
303 the effect of G+C contents may depend on host cell lineage. Singer *et al.* investigated  
304 the proportions of inflammation stimulatory (5'-RRCGY-3') and inhibitory  
305 (5'-NCCGNN-3' and 5'-NNCGRN-3') sequences in the genomes of pathogenic  
306 bacteria (37). They found species dependent differences in the proportion of  
307 stimulatory and inhibitory sequences, but they did not study the inflammatory  
308 responses of each pathogen. It would be a great interest whether the effect of G+C  
309 contents on inflammatory immune cytokines such as TNF- $\alpha$ , IL-1, and IL-6 caused by  
310 pathogenic bacteria.

311 In conclusion, our study provides a new perspective on the structure of DNA  
312 fragments that are able to activate pDCs via the TLR9-Myd88 pathway. Additional  
313 investigations and applications of our hypothesis may lead to the detailed  
314 understanding of host-bacterium interactions via TLR9 in other bacteria, other immune  
315 reactions, and other immunocytes.

316

317

318 **Materials and Methods.**

319 **Bacterial strains**

320 The bacterial strains used in this study, *Lactococcus lactis* LC-Plasma and  
321 *Lactobacillus rhamnosus* ATCC 53103, were purchased from the collections held at  
322 the Japan Collection of Microorganisms (JCM) and American Type Culture Collection  
323 (ATCC), respectively. Other bacterial strains used in the screening assay were  
324 purchased from JCM, ATCC, or NITE Biological Resource Center (NBRC).

325 Cultures of bacterial strains were grown at 30°C or 37°C for 48 hours in De Man,  
326 Rogosa, and Sharpe (MRS) medium (BD Biosciences) or GAM medium (Nissui),  
327 which were prepared according to the suppliers' instructions.

328 **Preparation of DNA fragments**

329 Genomic DNA was extracted and purified from bacterial cultures grown as  
330 described in the previous section, using QIAGEN Genomic-tip 500/G (Qiagen). PCR  
331 amplifications of selected sequences, which were based on the results of our *in silico*  
332 analysis, were performed using the GeneAmp PCR System (Applied Biosystems),  
333 with primers designed according to the *L. lactis* LC-Plasma genome sequence. PCR  
334 was performed using TaKaRa Ex *Taq*<sup>®</sup> (TaKaRa), according to the manufacturer's  
335 instructions, using 10 ng of DNA template in 50 µl of reaction mixture containing  
336 primers at a concentration of 0.5 µM. The following thermal cycling profile was used:  
337 5 min at 94°C followed by 35 cycles of 30 sec at 94°C for denaturation, 30 sec at  
338 hybridization temperatures based on the primers, and 30 sec at 72°C for extension; and  
339 then a final 7-min extension phase at 72°C.

340 The PCR products were purified using QIAquick PCR Purification Kit (Qiagen),  
341 according to the manufacturer's instructions, using 50 µl of elution solution. Each  
342 eluent was evaporated and concentrated on a DNA SpeedVac (Thermo Scientific). The  
343 concentrated DNA solutions were assessed by NanoDrop 2000 (Thermo Scientific),  
344 and the DNA concentration was adjusted to 10 mg/mL using double-distilled water.

345 The oligonucleotide sequences used for amplification; and the length, G+C  
346 content, and number of CpG motifs contained in the amplicon are shown in Suppl.  
347 Table 1. The draft genome sequence of *L. lactis* LC-Plasma was available to the public  
348 (38) and was used for the design of primers and other purposes.

#### 349 **Bone marrow (BM)-derived DC cultures**

350 Four to 8-week-old female BALB/c wild-type mice were purchased from CLEA  
351 Japan. All animal care and experimental procedures were performed in accordance  
352 with the guidelines of the Committee for Animal Experimentation at Kirin Company.  
353 These studies were approved by the Committee for Animal Experiment at Kirin  
354 Company.

355 Flt3L-induced DCs were generated as follows. BM cells were extracted from  
356 BALB/c mice, and erythrocytes were removed by brief exposure to 0.168 M NH<sub>4</sub>Cl.  
357 Cells were cultured at a density of  $5 \times 10^5$  cells/mL for 7 days in RPMI 1640 medium  
358 (Life Technologies) containing 1 mM sodium pyruvate (Life Technologies), 2.5 mM  
359 HEPES (Life Technologies), 100 U/mL penicillin/100 µg/mL streptomycin (Life  
360 Technologies), 50 µM 2-ME (Life Technologies), 10% fetal calf serum (Life  
361 Technologies), and 100 ng/mL Flt3L (R&D Systems).

362 **Stimulating assay for pDCs.**

363 BM-derived DC cultures were stimulated with purified PCR products at a final  
364 concentration of 2 µg/mL in the presence of FuGENE<sup>®</sup> HD Transfection Reagent  
365 (Promega) according to the manufacturer's instructions. Briefly, FuGENE HD was  
366 added to the RPMI 1640 medium with 1000-fold dilution in final. Then, purified PCR  
367 products were added and the mixture was incubated for 5 min at room temperature.  
368 Each incubated mixture (50 µL) was added to 500 µL of culture medium containing  
369 BM-derived DCs at a density of  $5.0 \times 10^5$  cells/mL. For the experiment using  
370 oligomers (less than 50bp nucleotides), FuGENE<sup>®</sup> HD was not used. After overnight  
371 incubation at 37°C in an atmosphere containing 5% CO<sub>2</sub> and 95% air, the cell cultures  
372 were collected and centrifuged to obtain culture supernatants. The supernatants were  
373 stored at -80°C until analysis. IFN-α concentration was measured using the  
374 VeriKine<sup>™</sup> IFN-α ELISA Kit (PBL Assay Science), according to the manufacturer's  
375 instructions.

376 ***In silico* analysis of bacterial genomes**

377 *In silico* analysis was performed using Genetyx ver.9 software (GENETYX).

378 We searched for 5'-purine-purine-CG-pyrimidine-pyrimidine-3' (5'-RRCGY-3')  
379 and 5'-purine-TCG-pyrimidine-pyrimidine-3' (5'-RTCGY-3'), and the total number  
380 of CpG hexamers (5'-NNCGNN-3') in each genome was also calculated. In addition,  
381 we searched for 4 immunostimulatory motifs that were previously identified in LAB,  
382 as follows: BL07 (5'-GCGTCGGTTTCGGTGCTCAC-3') (28), OL-LB7  
383 (5'-CGGCACGCTCACGATTCTTG-3') (29), ID35

384 (5'-ACTTTCGTTTTCTGCGTCAA-3') (30), and OL-LG10 (5'- ATTTTAC-3') (31) .

385        Genomic regions with low G+C content (e.g. G+C < 40%) were extracted using  
386 the source code that we created, based on the Perl Programming Language. When any  
387 200 bp fragment was calculated with a G+C content  $\geq$  40%, genomic regions  
388 containing that fragment were designated as high-G+C regions. The genome  
389 sequence data of *Lactococcus lactis* susp. *lactis* LC-Plasma, *Leuconostoc*  
390 *mesenteroides* NBRC 100496 (synonym of ATCC 8293), *Lactobacillus acidophilus*  
391 NCFM, *Lactobacillus plantarum* WCFS1, *Lactobacillus casei* ATCC 334,  
392 *Lactobacillus fermentum* IFO 3956, *Lactobacillus rhamnosus* ATCC 53103, and  
393 *Pediococcus pentosaceus* ATCC 25745 were obtained from GENBANK and were  
394 used for *in silico* analysis.

395

396

397

398           **References**

- 399    1.       Isolauri E, Salminen S. 2008. Probiotics: Use in Allergic Disorders: A Nutrition,  
400           Allergy, Mucosal Immunology, and Intestinal Microbiota (NAMI) Research Group  
401           Report. *Journal of Clinical Gastroenterology* 42:S91-S96.
- 402    2.       Shida K, Sato T, Iizuka R, Hoshi R, Watanabe O, Igarashi T, Miyazaki K, Nanno M,  
403           Ishikawa F. 2015. Daily intake of fermented milk with *Lactobacillus casei* strain  
404           Shirota reduces the incidence and duration of upper respiratory tract infections in  
405           healthy middle-aged office workers. *European Journal of Nutrition* 56:45-53.
- 406    3.       Nakayama Y, Moriya T, Sakai F, Ikeda N, Shiozaki T, Hosoya T, Nakagawa H,  
407           Miyazaki T. 2014. Oral administration of *Lactobacillus gasseri* SBT2055 is effective  
408           for preventing influenza in mice. *Scientific Reports* 4:4638.
- 409    4.       Fujiwara D, Inoue S, Wakabayashi H, Fujii T. 2004. The anti-allergic effects of lactic  
410           acid bacteria are strain dependent and mediated by effects on both Th1/Th2 cytokine  
411           expression and balance. *International Archives of Allergy and Immunology*  
412           135:205-215.
- 413    5.       Jounai K, Ikado K, Sugimura T, Ano Y, Braun J, Fujiwara D. 2012. Spherical lactic  
414           acid bacteria activate plasmacytoid dendritic cells immunomodulatory function via  
415           TLR9-dependent crosstalk with myeloid dendritic cells. *PLoS ONE* 7:e32588.
- 416    6.       Makino S, Ikegami S, Kano H, Sashihara T, Sugano H, Horiuchi H, Saito T, Oda M.  
417           Immunomodulatory Effects of Polysaccharides Produced by *Lactobacillus delbrueckii*  
418           ssp. *bulgaricus* OLL1073R-1. *Journal of Dairy Science* 89:2873-2881.
- 419    7.       Swiecki M, Colonna M. 2010. Unraveling the functions of plasmacytoid dendritic  
420           cells during viral infections, autoimmunity, and tolerance. *Immunological Reviews*  
421           234:142-62.
- 422    8.       Takagi H, Fukaya T, Eizumi K, Sato Y, Sato K, Shibasaki A, Otsuka H, Hijikata A,

- 423 Watanabe T, Ohara O, Kaisho T, Malissen B, Sato K. Plasmacytoid dendritic cells are  
424 crucial for the initiation of inflammation and T cell immunity in vivo. *Immunity*  
425 35:958-971.
- 426 9. Theofilopoulos AN, Baccala R, Beutler B, Kono DH. 2005. Type I interferon ( $\alpha/\beta$ ) in  
427 immunity and autoimmunity *Annual Review of Immunology* 23:307-335.
- 428 10. Parcina M, Wendt C, Goetz F, Zawatzky R, Zähringer U, Heeg K, Bekeredjian-Ding I.  
429 2008. *Staphylococcus aureus*-induced plasmacytoid dendritic cell activation is based  
430 on an IgG-mediated memory response. *The Journal of Immunology* 181:3823-3833.
- 431 11. Parker D, Prince A. 2012. *Staphylococcus aureus* induces type I IFN signaling in  
432 dendritic cells via TLR9. *The Journal of Immunology* 189:4040-4046.
- 433 12. Michea P, Vargas P, Donnadieu M-H, Roseblatt M, Bono MR, Duménil G, Soumelis  
434 V. 2013. Epithelial control of the human pDC response to extracellular bacteria.  
435 *European Journal of Immunology* 43:1264-1273.
- 436 13. Veckman V, Julkunen I. 2008. *Streptococcus pyogenes* activates human plasmacytoid  
437 and myeloid dendritic cells. *Journal of Leukocyte Biology* 83:296-304.
- 438 14. Jounai K, Sugimura T, Ohshio K, Fujiwara D. 2015. Oral administration of  
439 *Lactococcus lactis* subsp. *lactis* JCM5805 enhances lung immune response resulting  
440 in protection from murine parainfluenza virus infection. *PLoS ONE* 10:e0119055.
- 441 15. Sugimura T, Jounai K, Ohshio K, Tanaka T, Suwa M, Fujiwara D. 2013.  
442 Immunomodulatory effect of *Lactococcus lactis* JCM5805 on human plasmacytoid  
443 dendritic cells. *Clinical Immunology* 149:509-518.
- 444 16. Sugimura T, Takahashi H, Jounai K, Ohshio K, Kanayama M, Tazumi K, Tanihata Y,  
445 Miura Y, Fujiwara D, Yamamoto N. 2015. Effects of oral intake of plasmacytoid  
446 dendritic cells-stimulative lactic acid bacterial strain on pathogenesis of influenza-like  
447 illness and immunological response to influenza virus. *British Journal of Nutrition*

- 448 114:727-733.
- 449 17. Fujii T, Jounai K, Horie A, Takahashi H, Suzuki H, Ohshio K, Fujiwara D, Yamamoto  
450 N. 2017. Effects of heat-killed *Lactococcus lactis* subsp. *lactis* JCM 5805 on mucosal  
451 and systemic immune parameters, and antiviral reactions to influenza virus in healthy  
452 adults; a randomized controlled double-blind study. *Journal of Functional Foods*  
453 35:513-521.
- 454 18. Krieg AM, Ae-Kyung Y, Matson S, Waldschmidt TJ, Bishop GA, Teasdale R,  
455 Koretzky GA, Klinman DM. 1995. CpG motifs in bacterial DNA trigger direct B-cell  
456 activation. *Nature* 374:546-549.
- 457 19. Yamamoto S, Yamamoto T, Kataoka T, Kuramoto E, Yano O, Tokunaga T. 1992.  
458 Unique palindromic sequences in synthetic oligonucleotides are required to induce  
459 IFN and augment IFN-mediated natural killer activity. *J Immunol* 1992 Jun  
460 15;148(12):4072-6 148:4072-4076.
- 461 20. Tokunaga T, Yano O, Kuramoto E, Kimura Y, Yamamoto T, Kataoka T, Yamamoto S.  
462 1992. Synthetic oligonucleotides with particular base sequences from the cDNA  
463 encoding proteins of *Mycobacterium bovis* BCG induce interferons and activate  
464 natural killer cells. *Microbiol Immunol* 36:55-61.
- 465 21. Coch C, Busch N, Wimmenauer V, Hartmann E, Janke M, Abdel-Mottaleb MMA,  
466 Lamprecht A, Ludwig J, Barchet W, Schlee M, Hartmann G. 2009. Higher activation  
467 of TLR9 in plasmacytoid dendritic cells by microbial DNA compared with self-DNA  
468 based on CpG-specific recognition of phosphodiester DNA. *Journal of Leukocyte*  
469 *Biology* 86:663-670.
- 470 22. Krug A, Rothenfusser S, Hornung V, Jahrsdörfer B, Blackwell S, Ballas ZK, Endres S,  
471 Krieg AM, Hartmann G. 2001. Identification of CpG oligonucleotide sequences with  
472 high induction of IFN- $\alpha/\beta$  in plasmacytoid dendritic cells. *European Journal of*



- 473 Immunology 31:2154-2163.
- 474 23. Vollmer J, Weeratna R, Payette P, Jurk M, Schetter C, Laucht M, Wader T, Tluk S, Liu  
475 M, Davis HL, Krieg AM. 2004. Characterization of three CpG oligodeoxynucleotide  
476 classes with distinct immunostimulatory activities. European Journal of Immunology  
477 34:251-262.
- 478 24. Hartmann G, Weeratna RD, Ballas ZK, Payette P, Blackwell S, Suparto I, Rasmussen  
479 WL, Waldschmidt M, Sajuthi D, Purcell RH, Davis HL, Krieg AM. 2000. Delineation  
480 of a CpG phosphorothioate oligodeoxynucleotide for activating primate immune  
481 responses in vitro and in vivo. The Journal of Immunology 164:1617-1624.
- 482 25. Lenert P, Goeken AJ, Ashman RF. 2006. Extended sequence preferences for  
483 oligodeoxyribonucleotide activity. Immunology 117:474-481.
- 484 26. Lee K-W, Jung J, Lee Y, Kim T-Y, Choi S-Y, Park J, Kim D-S, Kwon H-J. 2006.  
485 Immunostimulatory oligodeoxynucleotide isolated from genome wide screening of  
486 *Mycobacterium bovis* chromosomal DNA. Molecular Immunology 43:2107-2118.
- 487 27. Choi YJ, Lee KW, Kwon HJ, Kim DS. 2006. Identification of immunostimulatory  
488 oligodeoxynucleotide from *Escherichia coli* genomic DNA. Journal of Biochemistry  
489 and Molecular Biology 39:788-793.
- 490 28. Takahashi N, Kitazawa H, Shimosato T, Iwabuchi N, Xiao JZ, Iwatsuki K, Kokubo  
491 S, Saito T. 2006. An immunostimulatory DNA sequence from a probiotic strain of  
492 *Bifidobacterium longum* inhibits IgE production in vitro. FEMS Immunol Med  
493 Microbiol 46:461-469.
- 494 29. Kitazawa H, Watanabe H, Shimosato T, Kawai Y, Itoh T, Saito T. 2003.  
495 Immunostimulatory oligonucleotide, CpG-like motif exists in *Lactobacillus*  
496 *delbrueckii* ssp. *bulgaricus* NIAI B6. International Journal of Food Microbiology  
497 85:11-21.

- 498 30. Iliev ID, Kitazawa H, Shimosato T, Katoh S, Morita H, He F, Hosoda M, Saito T. 2005.  
499 Strong immunostimulation in murine immune cells by *Lactobacillus rhamnosus* GG  
500 DNA containing novel oligodeoxynucleotide pattern. Cellular Microbiology  
501 7:403-414.
- 502 31. Kitazawa H, Ueha S, Itoh S, Watanabe H, Konno K, Kawai Y, Saito T, Itoh T,  
503 Yamaguchi T. 2001. AT oligonucleotides inducing B lymphocyte activation exist in  
504 probiotic *Lactobacillus gasseri*. International Journal of Food Microbiology  
505 65:149-162.
- 506 32. Narayanan S, Dalpke AH, Siegmund K, Heeg K, Richert C. 2003. CpG  
507 Oligonucleotides with modified termini and nicked dumbbell structure show enhanced  
508 immunostimulatory activity. Journal of Medicinal Chemistry 46:5031-5044.
- 509 33. Yu D, Putta MR, Bhagat L, Dai M, Wang D, Trombino AF, Sullivan T, Kandimalla ER,  
510 Agrawal S. 2008. Impact of secondary structure of toll-like receptor 9 agonists on  
511 interferon alpha induction. Antimicrobial Agents and Chemotherapy 52:4320-4325.
- 512 34. Heeg K, Dalpke A, Peter M, Zimmermann S. 2008. Structural requirements for uptake  
513 and recognition of CpG oligonucleotides. International Journal of Medical  
514 Microbiology 298:33-38.
- 515 35. Kant R, de Vos W, Palva A, Satokari R. 2014. Immunostimulatory CpG motifs in the  
516 genomes of gut bacteria and their role in human health and disease. Journal of  
517 Medical Microbiology 63:293-308.
- 518 36. Ménard O, Gafa V, Kapel N, Rodriguez B, Butel M-J, Waligora-Dupriet A-J. 2010.  
519 Characterization of immunostimulatory CpG-rich sequences from different  
520 *Bifidobacterium* species. Applied and Environmental Microbiology 76:2846-2855.
- 521 37. Singer M, de Waaij DJ, Morré SA, Ouburg S. 2015. CpG DNA analysis of bacterial  
522 STDs. BMC Infectious Diseases 15:273.

- 523 38. Fujii T, Tomita Y, Ikushima S, Horie A, Fujiwara D. 2015. Draft genome sequence of  
524 *Lactococcus lactis* subsp. *lactis* JCM 5805(T), a strain that induces plasmacytoid  
525 dendritic cell activation. *Genome Announcements* 3:e00113-15.  
526  
527

528 **Figure legends.**

529 **Fig 1.**

530 **IFN- $\alpha$  induction by CpG-rich DNA fragments from *L. lactis* LC-Plasma**

531 Flt3L-induced BM-DCs were stimulated by CpG-rich (R) or non-CpG (N) DNA  
532 fragments amplified from LC-Plasma genomic DNA. Each sample was added to cells  
533 at a final DNA concentration of 2  $\mu\text{g}/\text{mL}$  Each value is the mean concentration  $\pm$  S.D.  
534 for triplicate cultures.

535

536 **Fig 2.**

537 **Correlation between immunostimulatory activity and the numbers of CpG**  
538 **motifs or G+C content contained in DNA fragments**

539 Each dot depicts an independent 200 bp DNA fragment amplified from the  
540 LC-Plasma genome. Horizontal axes indicate A) the number of CpG motifs or B) G+C  
541 content contained in each DNA fragment. Vertical axes indicate the amount of IFN- $\alpha$   
542 produced by BM-DCs stimulated by each type of DNA fragment.

543

544 **Fig 3.**

545 **Correlation between the copy numbers of CpG motifs and IFN- $\alpha$  production**  
546 **in 200 bp DNA fragments**

547 Each dot depicts an independent 200 bp amplified DNA fragment. A) amplified  
548 from the LC-Plasma genomic regions with G+C < 40%. B) amplified from the  
549 LC-Plasma genomic regions with G+C  $\geq$  40%. C) IFN-a production activities per

550 CpG motifs in the DNA fragment having various G+C contents. IFN- $\alpha$  production by  
551 BM-DCs stimulated with each 200 bp DNA fragment was measured, and was divided  
552 by the copy numbers of CpG motifs. Bar depicts the standard deviation (S.D.). Bars  
553 with different notation exhibits significant difference (\*  $p < 0.05$ , \*\*  $p < 0.01$ )

554

555 **Fig 4.**

556 **IFN- $\alpha$  production induced by single- or double-stranded forms of synthetic**  
557 **oligonucleotides**

558 Single-stranded DNA oligomers (ssDNA) with phosphodiester bonds were  
559 synthesized, based on sequences of ODN1585 and ODN2216 (Invivogen, San Diego,  
560 CA, USA). Double-stranded DNA oligomers (dsDNA) were prepared by annealing  
561 sense and antisense strands of ssDNA. Each synthesized oligomer (2  $\mu$ g) was tested on  
562 Flt3L induced BM-DCs, and the production of IFN- $\alpha$  was measured. + : sense  
563 strand; - : antisense strand; ss-core: 6-base CpG motif of sense strand; ds-core :  
564 Hybrid of sense strand DNA oligomer with antisense strand of 6 base CpG motif.

565 \*not detected

566

567 **Fig 5.**

568 **CpG motifs frequency in the genome of species of LAB.**

569 The frequency in each genome was depicted as a dot: A) whole genome and B)  
570 G+C < 40% . *Ll*; *Lactococcus lactis* LC-Plasma, *Pp*; *Pediococcus pentosaceus*  
571 ATCC 25745, *Lm*; *Leuconostoc mesenteroides* ATCC 8293, *St*; *Streptococcus*

572 *thermophilus* CNRZ 1066, *Lp*; *Lactobacillus plantarum* WCFS1, *Lc*; *Lactobacillus*  
573 *casei* ATCC 334, *Lf*; *Lactobacillus fermentum* IFO 3956, *Bl*; *Bifidobacterium longum*  
574 NCC 2705

**Table 1. CpG motifs and copy numbers in the whole genome of LAB strains**

Copy number of typical CpG motifs in the whole genome of *L. lactis* LC-Plasma, *L. rhamnosus* ATCC 53103, and *Bifidobacterium longum* NCC2706 were determined as described in Materials and Methods.

| Motifs                 | Bacterial strains                     |                                              |                                          |         |         |
|------------------------|---------------------------------------|----------------------------------------------|------------------------------------------|---------|---------|
|                        | <i>Lactococcus lactis</i><br>JCM 5805 | <i>Lactobacillus rhamnosus</i><br>ATCC 53103 | <i>Bifidobacterium longum</i><br>NCC2705 |         |         |
| pDCs-<br>activating    | RRCGRYCGYY                            | 51                                           | 195                                      | 288     |         |
|                        | RYCGYRTCGYR                           | 8                                            | 54                                       | 139     |         |
|                        | RYCGRY                                | 3,072                                        | 17,681                                   | 25,057  |         |
| B cells-<br>activating | Optimal<br>for mice                   | RRCGY                                        | 4,691                                    | 13,169  | 13,118  |
|                        | Optimal<br>for human                  | GTCGTT                                       | 882                                      | 1,534   | 1,295   |
|                        | CpG hexamer                           | NNCGNN                                       | 61,462                                   | 180,144 | 240,176 |

**Table 2. pDCs stimulatory activity of LAB strains with varied GC contents in genome DNA**\*Number of high (>100 pg/mL)-IFN- $\alpha$ -producing strains per tested strains.

| Species                          | Strains         | IFN- $\alpha$<br>(pg/mL) | CpG<br>frequency (per kb) <sup>#</sup> | GC<br>(%) | High* |
|----------------------------------|-----------------|--------------------------|----------------------------------------|-----------|-------|
| <i>Lactococcus lactis</i>        | JCM 5805        | 404.4                    |                                        |           |       |
|                                  | JCM 20101       | 389.8                    | 22.3                                   | 35.3      | 2/3   |
|                                  | ATCC 15577      | 12.2                     |                                        |           |       |
|                                  | mean $\pm$ S.E. | 271.0 $\pm$ 24.6         |                                        |           |       |
| <i>Pediococcus pentosaceus</i>   | JCM 2026        | 84.0                     |                                        |           |       |
|                                  | JCM 20109       | 353.3                    |                                        |           |       |
|                                  | JCM 20314       | 102.1                    |                                        |           |       |
|                                  | JCM 20459       | 5.5                      |                                        |           |       |
|                                  | NBRC 3182       | 59.1                     |                                        |           |       |
|                                  | NBRC 3891       | 15.8                     |                                        |           |       |
|                                  | NBRC 3892       | 116.4                    |                                        |           |       |
|                                  | NBRC 3893       | 32.2                     |                                        |           |       |
|                                  | NBRC 3894       | 46.0                     |                                        |           |       |
|                                  | NBRC 12229      | 18.7                     | 28.4                                   | 37.4      | 5/19  |
|                                  | NBRC 12230      | 7.9                      |                                        |           |       |
|                                  | NBRC 12232      | 14.8                     |                                        |           |       |
|                                  | NBRC 12318      | 59.8                     |                                        |           |       |
|                                  | NBRC 101982     | 404.4                    |                                        |           |       |
|                                  | NBRC 101983     | 5.6                      |                                        |           |       |
|                                  | NBRC 101984     | 5.9                      |                                        |           |       |
|                                  | NBRC 101985     | 5.8                      |                                        |           |       |
|                                  | NBRC 101986     | 172.3                    |                                        |           |       |
|                                  | NBRC 101987     | 34.3                     |                                        |           |       |
|                                  | mean $\pm$ S.E. | 81.3 $\pm$ 114.5         |                                        |           |       |
| <i>Leuconostoc mesenteroides</i> | NBRC 3349       | 3.2                      |                                        |           |       |
|                                  | NBRC 3426       | 57.3                     |                                        |           |       |
|                                  | NBRC 3832       | 353.5                    |                                        |           |       |
|                                  | NBRC 12060      | 4.2                      |                                        |           |       |
|                                  | NBRC 100495     | 5.7                      |                                        |           |       |
|                                  | NBRC 100496     | 8.1                      | 27.1                                   | 37.7      | 2/10  |
|                                  | NBRC 102497     | 36.0                     |                                        |           |       |
|                                  | NBRC 102480     | 74.2                     |                                        |           |       |
|                                  | NBRC 102481     | 167.0                    |                                        |           |       |
|                                  | NBRC 107766     | 4.4                      |                                        |           |       |
|                                  | mean $\pm$ S.E. | 71.4 $\pm$ 111.6         |                                        |           |       |
| <i>Lactobacillus acidophilus</i> | JCM 1132        | 11.7                     | 15.4                                   | 34.7      |       |
|                                  | JCM 1551        | 16.7                     |                                        |           |       |
| <i>Lactobacillus plantarum</i>   | JCM 6651        | 55.2                     | 4.6                                    | 39.1      | 0/5   |
|                                  | JCM 8341        | 4.0                      |                                        |           |       |
|                                  | JCM 20110       | 9.8                      |                                        |           |       |
| <i>Lactobacillus</i> low G+C     | mean $\pm$ S.E. | 19.5 $\pm$ 20.5          |                                        | < 40      |       |
| <i>Lactobacillus casei</i>       | ATCC 393        | 5.6                      | 1.5                                    | 46.6      |       |
| <i>Lactobacillus rhamnosus</i>   | ATCC 53103      | 3.9                      |                                        | 47.0      |       |
| <i>Lactobacillus fermentum</i>   | NBRC 3959       | 4.4                      | 1.9                                    | 51.5      | 0/4   |
|                                  | NBRC 3961       | 5.2                      |                                        |           |       |
| <i>Lactobacillus</i> high G+C    | mean $\pm$ S.E. | 4.8 $\pm$ 0.8            |                                        | 40 $\leq$ |       |



**FIG 1**

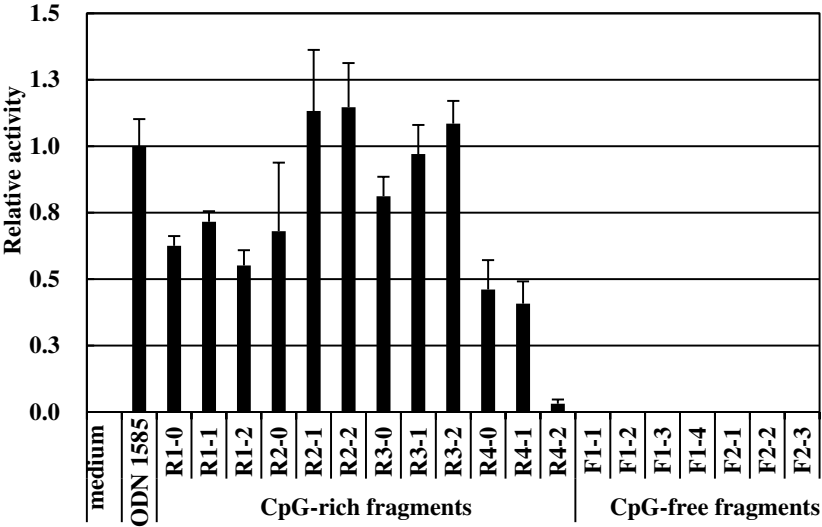

**IFN- $\alpha$  induction by CpG-rich DNA fragments from *L. lactis* LC-Plasma**

Flt3L-induced BM-DCs were stimulated by CpG-rich (R) or non-CpG (N) DNA fragments amplified from LC-Plasma genomic DNA. Each sample was added to cells at a final DNA concentration of 2  $\mu\text{g}/\text{mL}$ . Each value is the mean concentration  $\pm$  S.D. for triplicate cultures.

# FIG 2

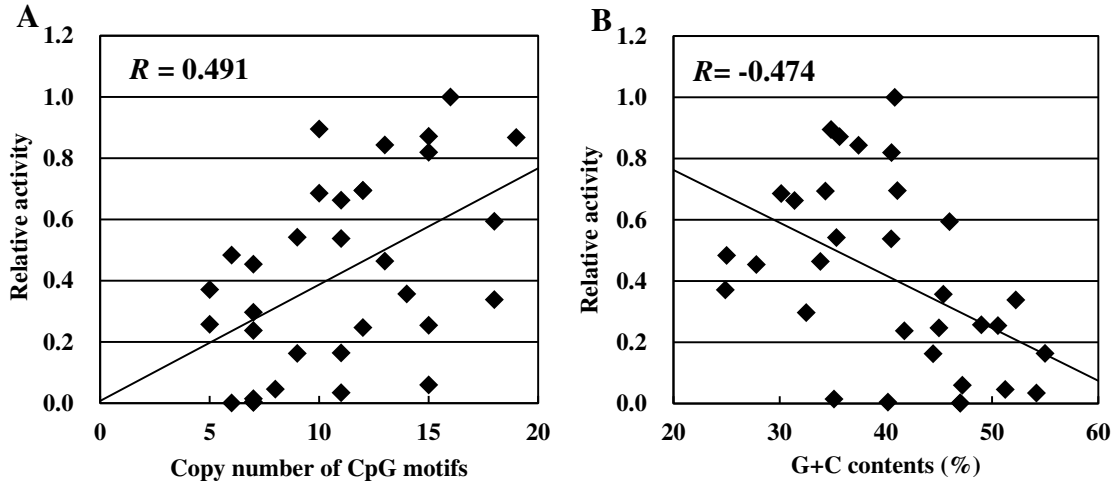

### Correlation between immunostimulatory activity and the numbers of CpG motifs or GC content contained in DNA fragments

Each dot depicts an independent 200 bp DNA fragment amplified from the LC-Plasma genome. Horizontal axes indicate A) the number of CpG motifs or B) G+C content contained in each DNA fragment. Vertical axes indicate the amount of IFN- $\alpha$  produced by BM-DCs stimulated by each type of DNA fragment.

**FIG 3**

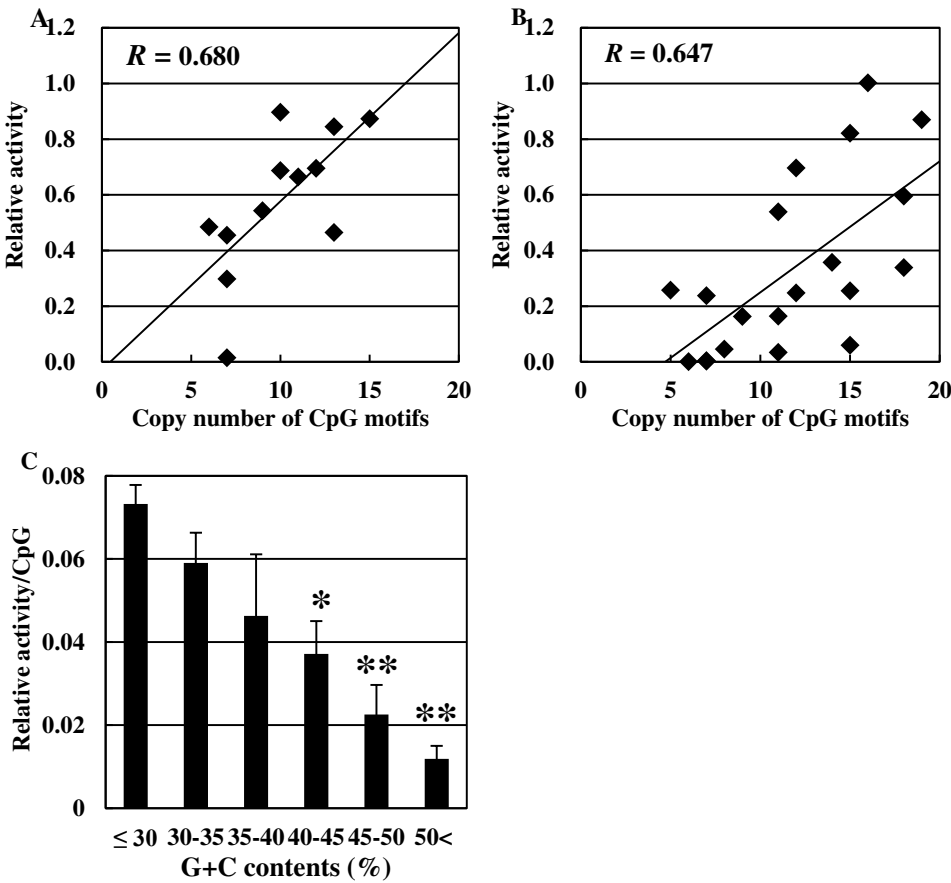

**Correlation between the copy numbers of CpG motifs and IFN- $\alpha$  production in 200-bpDNA fragments**

Each dot depicts an independent 200-bp amplified DNA fragment. A) amplified from the LC-Plasma genomic regions with G+C < 40%. B) amplified from the LC-Plasma genomic regions with G+C  $\geq$  40%. C) IFN- $\alpha$  production activities per CpG motifs in the DNA fragment having various G+C contents. IFN- $\alpha$  production by BM-DCs stimulated with each 200-bp DNA fragment was measured, and was divided by the copy numbers of CpG motifs. Bar depicts the standard deviation (S.D.). Bars with different notation exhibits significant difference (\*  $p < 0.05$ , \*\*  $p < 0.01$ )

**FIG 4**

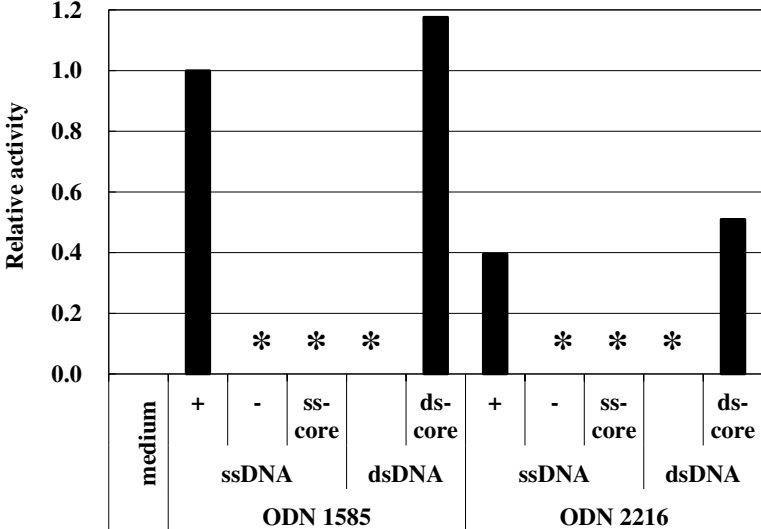

**IFN-α production induced by single- or double-stranded forms of synthetic oligonucleotides**

Single-stranded DNA oligomers (ssDNA) with phosphodiester bonds were synthesized, based on sequences of ODN1585 and ODN2216 (Invivogen, San Diego, CA, USA). Double-stranded DNA oligomers (dsDNA) were prepared by annealing sense and antisense strands of ssDNA. Each synthesized oligomer (2 μg) was tested on Flt3L induced BM-DCs, and the production of IFN-α was measured. + : sense strand; - : antisense strand; ss-core: 6 base CpG motif of sense strand; ds-core : Hybrid of sense strand DNA oligomer with antisense strand of 6 base CpG motif. \*not detected

**FIG 5**

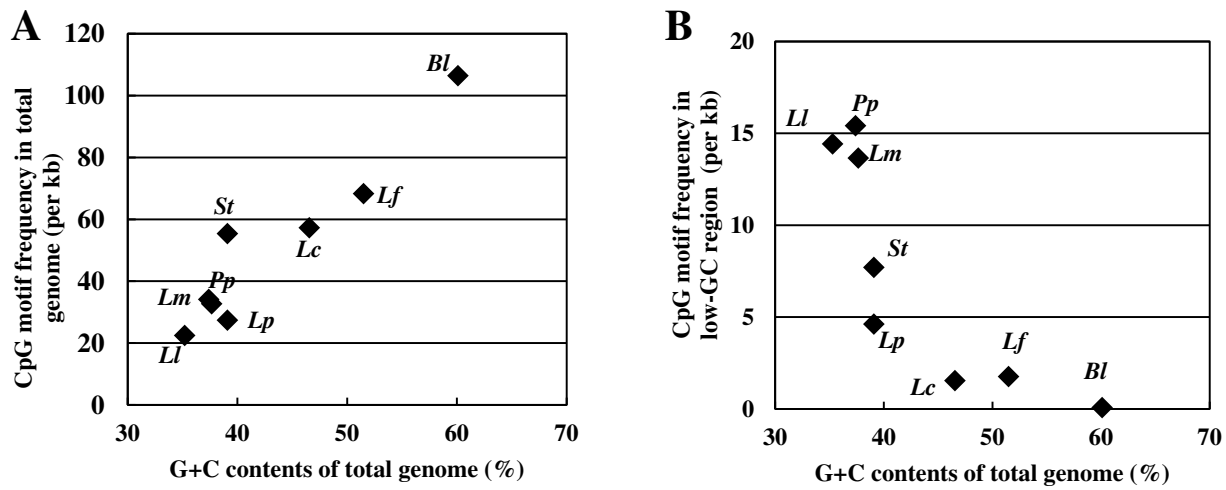

**CpG motifs frequency in the genome of species of LAB.**

The frequency in each genome was depicted as a dot: A) whole genome and B) G+C < 40% . *Ll*; *Lactococcus lactis* LC-Plasma, *Pp*; *Pediococcus pentosaceus* ATCC 25745, *Lm*; *Leuconostoc mesenteroides* ATCC 8293, *St*; *Streptococcus thermophilus* CNRZ 1066, *Lp*; *Lactobacillus plantarum* WCFS1, *Lc*; *Lactobacillus casei* ATCC 334, *Lf*; *Lactobacillus fermentum* IFO 3956, *Bl*; *Bifidobacterium longum* NCC 2705
